# Supplementary material
Source: MDPI journal article supplement (https://www.mdpi.com/2073-4352/13/3/445)

## Supplementary Materials

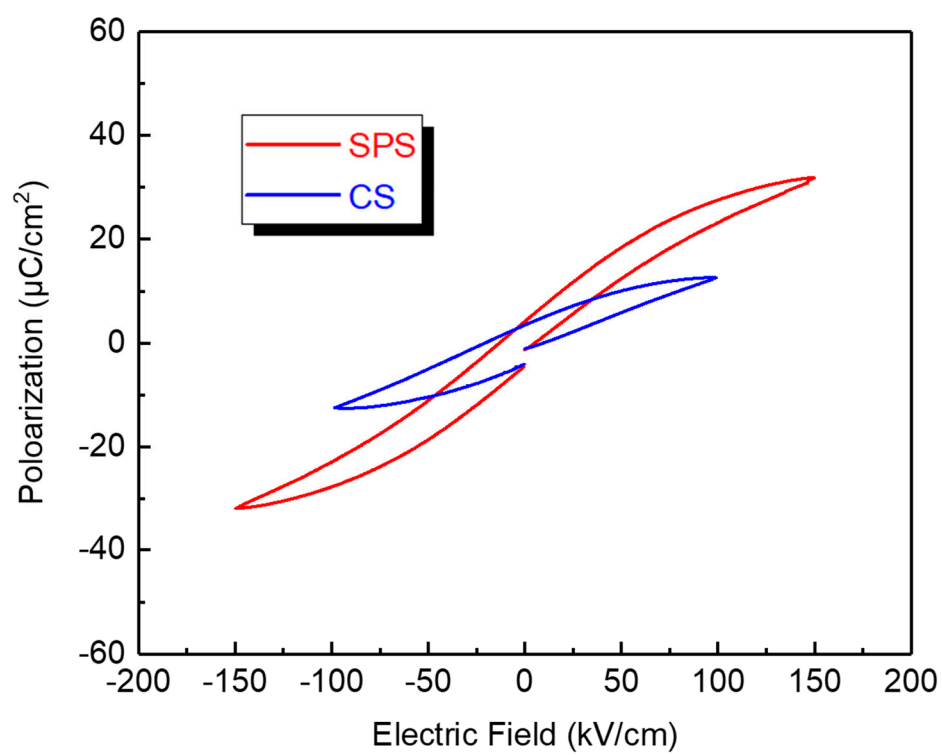

Figure S1 bipolar  $P$ - $E$  loops of samples prepared by CS and SPS

Supplement: s1 [file s1]
